# Supplementary material for: HR-Mediated Defense Response is Overcome at High Temperatures in Capsicum Species
Source: PubMed Central journal article supplement — Plant Pathol J. 2018 Feb 1;34(1):71–7. doi: 10.5423/PPJ.NT.06.2017.0120 (PMC5796752; doi:10.5423/ppj.nt.06.2017.0120), 2018-02-01
Supplement: ppj-34-071_suppl.pdf [file ppj-34-071_suppl.pdf]

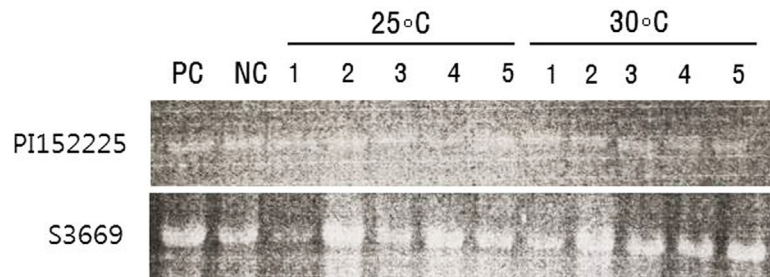

**Supplementary Fig. 1.** RNA loading controls for Northern blot analysis of viral RNA accumulation in (A) PI152225 and (B) S3669 for Fig. 4.
